1  
2  
3  
4  
5  
6  
7  
8  
9  
10  
11

# Synaptic contributions to cochlear outer hair cell Ca<sup>2+</sup> homeostasis

Marcelo J. Moglie<sup>1</sup>, Diego L. Wengier<sup>1</sup>, A. Belén Elgoyhen<sup>1</sup> & Juan D. Goutman<sup>1</sup>

<sup>1</sup> Instituto de Investigaciones en Ingeniería Genética y Biología Molecular “Dr. Héctor N. Torres” (IN-  
GEBI), C. A. Buenos Aires (1428) Argentina

## 12 **Abstract**

13 For normal cochlear function, outer hair cells (OHCs) require a precise regulation of intracellular  $\text{Ca}^{2+}$   
 14 levels. Influx of  $\text{Ca}^{2+}$  occurs both at the stereocilia tips and through the basolateral membrane. In this  
 15 latter compartment, two different origins for  $\text{Ca}^{2+}$  influx have been poorly explored: voltage-gated  $\text{Ca}^{2+}$   
 16 channels (VGCC) at synapses with type II afferent neurons, and  $\alpha 9\alpha 10$  cholinergic nicotinic receptors  
 17 at synapses with medio-olivochlear complex (MOC) neurons. Using functional imaging, we report that  
 18 these two  $\text{Ca}^{2+}$  entry sites are closely positioned, but present different regulation mechanisms.  $\text{Ca}^{2+}$   
 19 spread from MOC synapses is contained by cisternal  $\text{Ca}^{2+}$ -ATPases. Considered a weak drive for trans-  
 20 mitter release, we found that VGCC  $\text{Ca}^{2+}$  signals are larger than expected and can be potentiated by  
 21 ryanodine receptors. Finally, we showed that sorcin, a highly expressed gene product in OHCs with re-  
 22 ported  $\text{Ca}^{2+}$  control function in cardiomyocytes, regulates basal  $\text{Ca}^{2+}$  levels and MOC synaptic activity  
 23 in OHCs.

## 24 **Introduction**

25 Cochlear OHCs are a unique group of cells with a highly polarized structure, featuring a stereocilia  
 26 bundle on their apical end, and synaptic connections on the basolateral membrane. One important as-  
 27 pect of OHCs physiology is the precise homeostasis and tight regulation of  $\text{Ca}^{2+}$  during normal activity.  
 28 Within OHCs stereocilia high concentrations of proteinaceous  $\text{Ca}^{2+}$  buffers co-exist with large amounts  
 29 of extrusion pumps, suggesting that mechanisms to quickly clear out  $\text{Ca}^{2+}$  increments are highly re-  
 30 quired (Chen et al., 2012; Dumont et al., 2001; Hackney et al., 2005; Sakaguchi et al., 1998; Yamoah et  
 31 al., 1998). The main  $\text{Ca}^{2+}$  source are mechanotransducer channels located at the tip of stereocilia  
 32 (Beurg et al., 2009; Fettiplace & Nam, 2018). A layer of mitochondria right below the cuticular plate  
 33 (where stereocilia insert) plays the important role of restraining any  $\text{Ca}^{2+}$  leak into the basolateral com-  
 34 partment of the cell (Beurg et al., 2010; Furness & Hackney, 2006).

35 Two other important  $\text{Ca}^{2+}$  sources in OHCs have been less characterized: the voltage gated L-type  $\text{Ca}^{2+}$   
 36 channels (VGCC) (Knirsch et al., 2007), and the  $\alpha 9\alpha 10$  cholinergic nicotinic receptors (Gómez-Casati  
 37 et al., 2005; Weisstaub et al., 2002). Both VGCC and  $\alpha 9\alpha 10$  receptors are located at the basolateral  
 38 membrane of OHCs, at synapses with type II afferent fibers in the case of the former (Saito, 1990), and  
 39 on the postsynaptic side of synapses with MOC fibers in the latter (Elgoyhen et al., 1994, 2001). Com-  
 40 pared to inner hair cells (IHCs), OHCs show smaller  $\text{Ca}^{2+}$  currents through VGCC (Beurg et al., 2008;  
 41 Johnson & Marcotti, 2008; Knirsch et al., 2007; Wong et al., 2013), and also present synaptic ribbons  
 42 with irregular shapes and fewer vesicles in their vicinity (see for review: Fuchs & Glowatzki, 2015).  
 43 These contacts have a weak synaptic drive, not suited for sound encoding, but it has been proposed that  
 44 type II afferents could mediate pain perception (Flores et al., 2015; Liu et al., 2015).

45 On the other hand, cholinergic MOC synapses onto OHCs are inhibitory and provide the means to  
 46 modulate mechanosensitivity (Guinan, 1996). Synaptic responses are mediated by the highly  $\text{Ca}^{2+}$ -per-  
 47 meable  $\alpha 9\alpha 10$  receptors, coupled to the activation of SK2 ( $\text{Ca}^{2+}$ -activated  $\text{K}^+$ ) channels which ulti-  
 48 mately produces inhibition (Fuchs, 1996; Gómez-Casati et al., 2005; Weisstaub et al., 2002). Detailed  
 49 electron micrographs have shown postsynaptic cisterns within OHCs, closely aligned with presynaptic  
 50 efferent synaptic contacts (Engström, 1958; Fuchs et al., 2014; Saito, 1980; Smith & Sjöstrand, 1961).  
 51 This synaptic cistern has been proposed to serve as a  $\text{Ca}^{2+}$  store that modulates efferent synaptic re-  
 52 sponses by mechanisms such as  $\text{Ca}^{2+}$ -induced  $\text{Ca}^{2+}$  release (CICR), through ryanodine receptors (RyR)  
 53 (Evans et al., 2000; Grant et al., 2006; Lioudyno et al., 2004; Sridhar et al., 1997). Since the evidence  
 54 for the role of RyR is indirect, in the present study we investigated their participation in directly modu-

55 lating  $\text{Ca}^{2+}$  signaling through  $\alpha 9\alpha 10$  receptors or VGCC. Using an *ex-vivo* preparation of the cochlea  
 56 from post-hearing onset mice, and functional  $\text{Ca}^{2+}$  imaging, we found that  $\text{Ca}^{2+}$  signals from VGCC are  
 57 unexpectedly large, comparable in size with  $\alpha 9\alpha 10$  transients, and can be modulated by RyR. On the  
 58 contrary,  $\text{Ca}^{2+}$  transients produced by  $\alpha 9\alpha 10$  activation were not affected by RyR, and were efficiently  
 59 contained by cisternal  $\text{Ca}^{2+}$ -ATPases.

60 Another regulation factor that was tested in present study is the small  $\text{Ca}^{2+}$ -binding protein sorcin. Pre-  
 61 viously shown to control  $\text{Ca}^{2+}$ -based excitation-contraction coupling in myocytes (Colotti et al., 2014),  
 62 sorcin was recently identified among the most differentially expressed genes in OHCs (Li et al., 2018;  
 63 Ranum et al., 2019). Adding sorcin to OHCs cytoplasm produced a strong reduction in the resting  $\text{Ca}^{2+}$   
 64 concentration, and inhibition of efferent synaptic currents. Thus, the present results shed light into  $\text{Ca}^{2+}$   
 65 homeostasis in the hair cells involved in sound amplification at the cochlea, and unveil a role for the  
 66 novel protein sorcin.

67

## 68 **Results:**

69

### 70 **Local acetylcholine application evokes a global $\text{Ca}^{2+}$ rise in OHCs**

71 To directly measure  $\text{Ca}^{2+}$  influx and spread by activation of  $\alpha 9\alpha 10$  receptors, the  $\text{Ca}^{2+}$ -sensitive indica-  
 72 tor Fluo-4 was loaded into cells through the patch-clamp electrode. In a first approach, a local applica-  
 73 tion pipette was used to puff acetylcholine (ACh) onto the organ of Corti preparation. Figure 1A  
 74 presents a series of images taken at the OHCs base, before and after ACh application. The first image in  
 75 the sequence also shows an array of regions of interest (ROIs) designed to measure fluorescence  
 76 changes in the cytoplasm as a function of time ( $\% \Delta F/F_0$ , unless otherwise indicated). The application of  
 77 a saturating concentration of ACh (1 mM) produced a global and long lasting elevation of cytoplasmic  
 78  $\text{Ca}^{2+}$  (images in Fig. 1A and traces of fluorescence intensity as a function of time in Fig. 1B). The mean  
 79 peak of the  $\Delta F/F_0$  signal was  $311 \pm 65 \%$ , with a corresponding electrophysiological response integral  
 80 of  $1.9 \pm 0.3 \text{ nC}$  ( $n = 6$ , Fig. 1C-E). These values were considered as an upper limit of efferent activa-  
 81 tion, since the saturating concentration of an externally applied agonist would activate receptors distrib-  
 82 uted throughout the surface of the cell.

83

### 84 **Cholinergic synaptic $\text{Ca}^{2+}$ signals in OHCs**

85 An alternative and more physiological approach to investigate efferent input to OHCs was undertaken  
 86 by electrically stimulating MOC axons innervating these cells. Figure 2A shows a series of images of  
 87 an OHC during a typical protocol of MOC fibers stimulation. In contrast to what was observed with  
 88 ACh external applications, local and brief  $\text{Ca}^{2+}$  transients were observed with synaptic activation. Only  
 89 one  $\text{Ca}^{2+}$  entry site was observed in each recorded OHC ( $n = 6$  cells). Representative traces of fluores-  
 90 cence changes at the brightest ROI are shown in the bottom panel of Figure 2B (red traces), whereas  
 91 the corresponding synaptic currents recorded in the same trials are included in the top panel (black  
 92 traces). Paired pulses were used instead of single stimuli to increase the otherwise very low release  
 93 probability (Ballesterio et al., 2011; Vattino et al., 2020). Due to frame rate limitations, the imaging sig-  
 94 nal appears as the ensemble activation in response to both stimuli in a pair. An average of  $100 \pm 22$   
 95 stimulation trials were performed per cell (range 60 – 200,  $n = 6$  cells), with a synaptic success rate of  
 96  $87 \pm 3 \%$  (range: 73 – 98 %,  $n = 6$ ). In turn,  $\text{Ca}^{2+}$  signals were detected in  $83 \pm 5\%$  (range: 64 – 99 %,  $n$   
 97 = 6) of trials with successful synaptic events. In paired pulse protocols, an average  $\text{Ca}^{2+}$  signal of  $2.7 \pm$   
 98  $0.3 \%$   $\Delta F/F_0$  ( $n = 6$  cells) was obtained, whereas the integral of the synaptic currents was  $7.4 \pm 0.8 \text{ pC}$  ( $n$

= 6) (Fig. 2C and D). Imaging and electrophysiological responses correlated, as shown in Figure 2E ( $r = 0.88$  in this representative example, range: 0.65 – 0.95,  $n = 6$ ). This strong correlation indicates that the imaging signal is a good proxy for  $\alpha 9\alpha 10$  and SK2 synaptic activation, most likely reflecting  $\text{Ca}^{2+}$  influx through nicotinic receptors. In order to maximize the  $\text{Ca}^{2+}$  driving force, OHCs were transiently voltage-clamped at -100 mV in these experiments (for the duration of the synaptic response, otherwise, at -40 mV. See Methods) such that inward currents were due to the activation of both  $\alpha 9\alpha 10$  receptors and SK2 channels ( $\text{K}^+$  equilibrium potential:  $\sim -82$  mV).

### Synaptic $\text{Ca}^{2+}$ signals during trains of efferent stimuli

One of the most common MOC activation pathways is the result of a feedback loop starting in the afferent pathway and producing steady firing of efferent neurons at rates of up to 200 1/sec (Brown, 1989; Guinan, 2006; Liberman, 1988). Repetitive activation of MOC axons leads to presynaptic facilitation in neurotransmitter release (Ballesteros et al., 2011). The postsynaptic consequences of the stimulation in trains are shown as synaptic  $\text{Ca}^{2+}$  transients in response to repetitive MOC stimulation at 20, 40 and 80 Hz (300 msec of duration each, Fig. 3). Images included in Figure 3A were taken at the peak of the  $\text{Ca}^{2+}$  rise for each train, whereas panel B shows average synaptic currents (top, in black) and the corresponding  $\text{Ca}^{2+}$  signals (bottom, in red) taken at the brightest ROI in each cell.  $\text{Ca}^{2+}$  levels varied with the frequency of the stimulation train, with average amplitudes at 20, 40 and 80 Hz trains of  $5.1 \pm 1.1 \% \Delta F/F_0$ ,  $9.5 \pm 2.2 \% \Delta F/F_0$  and  $15.6 \pm 2.5 \% \Delta F/F_0$  ( $n = 8$ ,  $p = 0.0001$  Friedman's test, Fig. 3C), respectively. The integral of the ensemble synaptic response across the duration of the train was  $23.6 \pm 6.2$  pC,  $43.3 \pm 11.0$  pC and  $64.1 \pm 8.8$  pC ( $n = 8$ ,  $p < 0.0001$  Friedman's test, Fig. 3D).

A close interdependence of synaptic and  $\text{Ca}^{2+}$  responses was also noted in the correlation between peak  $\Delta F/F_0$  and the integral of synaptic currents, elicited by trains at different frequencies ( $r = 0.88$ , Fig. 3E). As suggested by the representative images, trains at 20 Hz elicited a localized  $\text{Ca}^{2+}$  rise with a measurable spread which accounted for  $31 \pm 5 \%$  of the area corresponding to the imaged OHC area. At 40 or 80 Hz  $\text{Ca}^{2+}$  signals reached a larger part of the cytoplasmic space, with averages values of  $48 \pm 6 \%$  and  $63 \pm 5 \%$ , respectively ( $n = 8$ ,  $p < 0.0001$  Friedman's test, Fig. 3F).

In order to obtain a better understanding of  $\text{Ca}^{2+}$  dynamics during sustained MOC activity, trains of stimuli at 80 Hz were applied for longer periods of time, up to 3 sec (Fig. 3G and H). A sustained  $\text{Ca}^{2+}$  load was observed in OHCs, with peak values that did not differ when different train durations were compared ( $p = 0.57$  Friedman's test). This latter result indicates that mechanisms for controlling  $\text{Ca}^{2+}$

entering from efferent sources are highly efficient, preventing a large  $\text{Ca}^{2+}$  load even during a 3 sec stimulation. The role of the sub-synaptic cistern in this phenomenon has been suggested in the past (Evans et al., 2000; Lioudyno et al., 2004; Sridhar et al., 1997) and it was evaluated in the following section.

### **Modulation of efferent $\text{Ca}^{2+}$ by cisterns**

One important factor are sarcoplasmic/endoplasmic reticulum  $\text{Ca}^{2+}$ -ATPases (SERCA), responsible for removing free  $\text{Ca}^{2+}$  ions from the cytoplasm. To address the role of SERCA in shaping  $\text{Ca}^{2+}$  transients, the specific blocker thapsigargin (1  $\mu\text{M}$ ) was added to the bath during an OHC recording. In the absence of any stimulation, the basal fluorescence increased when perfusing thapsigargin from a control value of  $1396 \pm 551$  A.U. (arbitrary units) to  $1851 \pm 502$  A. U. ( $n = 6$ ,  $p = 0.024$  Wilcoxon test) (Fig. 4B inset). This  $\sim 30\%$  increase in the basal cytoplasmic concentration of  $\text{Ca}^{2+}$  would represent a basal SERCA activity responsible for pumping ions out of the OHC cytoplasm at rest.

To determine the role for SERCA in regulating synaptic  $\text{Ca}^{2+}$ , trains of MOC stimuli were applied before and during the application of thapsigargin (Fig. 4A-D). Peak  $\Delta F$  values were calculated (Fig. 4B), instead of  $\Delta F/F_0$ , to avoid the artifact effect of a higher basal fluorescence on the estimation of the size of the  $\text{Ca}^{2+}$  transients. Synaptic currents integral are shown in Figure 4C. Peak  $\Delta F$  values for control trains at 20, 40 and 80 Hz were respectively  $38.4 \pm 8.6$  A. U.,  $73.4 \pm 10.5$  A. U., and  $125.9 \pm 21.8$  A. U. ( $n = 5$ ), showing statistical differences between trains as previously indicated for  $\Delta F/F_0$  measure ( $p = 0.0085$ , Friedman's test). With thapsigargin in the bath,  $\Delta F$  values grew to  $55.8 \pm 14.1$  A. U.,  $107.9 \pm 24.5$  A. U., and  $205.7 \pm 39.9$  A. U. respectively for the 20, 40 and 80 Hz trains ( $n = 6$ ), showing statistically significant differences for the 80 Hz train compared to control ( $p = 0.04$ , Wilcoxon signed-rank test).

The effect of thapsigargin on the duration of the synaptic  $\text{Ca}^{2+}$  transients was also analyzed, by measuring the 'full width at half maximum' (FWHM) of the signal. In control conditions, FWHM values varied with the stimulation frequency:  $485 \pm 79$  ms at 80 Hz,  $344 \pm 80$  ms at 40 Hz, and  $211 \pm 45$  ms at 20 Hz ( $n = 5$ ,  $p = 0.0097$ , Friedman's test). In the case of the 20 Hz train, the FWHM of the transient was even shorter than the stimulating train duration (300 ms) due to sporadic synaptic activation. Thapsigargin prolonged  $\text{Ca}^{2+}$  transients with average values of  $569 \pm 62$  ms at 80 Hz,  $372 \pm 39$  ms at 40 Hz, and  $180 \pm 20$  ms at 20 Hz ( $n = 5$ ,  $p = 0.048$  Wilcoxon signed-ranked test for the 80 Hz train compared to control). Taken together, these results indicate that SERCA pumps, and the sub-synaptic cistern, play a

significant role in accelerating the removal of  $\text{Ca}^{2+}$  entering through efferent synapses, and also in curtailing the peak of the transient.

Since the presence of RyR has been shown both morphologically and functionally at the MOC - OHC synapse (Evans et al., 2000; Grant et al., 2006; Lioudyno et al., 2004), in the following experiments we tested  $\text{Ca}^{2+}$  dynamics in the presence of drugs that modulate RyR. To avoid indirect or presynaptic effects, drugs were included in the patch pipette (control experiments included vehicle – DMSO). Low (1  $\mu\text{M}$ ) and high (100  $\mu\text{M}$ ) concentrations of ryanodine were used to either activate or block RyR. Dantrolene, a specific inhibitor of these receptors, was also used. Interestingly, none of these treatments showed any effect on either the amplitude of synaptic  $\text{Ca}^{2+}$  transients (Fig. 4E and H, Kruskal-Wallis test) (same for  $\Delta F$ ), duration (estimated as FWHM, Fig. 4E and G, Kruskal-Wallis test) or basal  $\text{Ca}^{2+}$  (Fig. 4F, Kruskal-Wallis test). The corresponding values for these experiments are shown in Table 1.

### **Efferent $\text{Ca}^{2+}$ regulation by sorcin**

A number of genes related to  $\text{Ca}^{2+}$  regulation are highly-expressed in OHCs (compared to IHCs and supporting cells) (Li et al., 2018; Ranum et al., 2019). Sorcin, a gene product related to the regulation of CICR in cardiac myocytes (Farrell et al., 2003), was identified in OHCs both by RNAseq and immunostaining (Li et al., 2018; Ranum et al., 2019). We evaluated the effect of sorcin on efferent  $\text{Ca}^{2+}$  transients, by adding recombinant sorcin (3  $\mu\text{M}$ ) to the intracellular pipette solution. The basal  $\text{Ca}^{2+}$  concentration in the OHC cytoplasm was higher in the presence of sorcin. In control conditions, basal fluorescence was  $1145 \pm 112$  A. U., whereas with sorcin this value increased to  $2091 \pm 316$  A. U (Fig. 5B,  $n = 6$ ,  $p = 0.02$  Mann-Whitney U test). Considering that basal fluorescence was partially dependent on the recordings conditions of a given cell, and that sorcin recordings were done in a different set of cells than controls, the possibility that cells with sorcin were more leaky than the controls was evaluated. Basal fluorescence as a function of leak current (within the first 10 minutes of recording) was plotted and grouped in control and sorcin cells (Fig. 5C). Each group was fitted with a line showing that basal fluorescence grew faster in sorcin cells and with a significantly larger slope (F-test,  $p = 0.0038$ ) within a similar range of leak current values, implicating that sorcin increased resting  $\text{Ca}^{2+}$  concentration values *per se*, and not due to worsened recording conditions.

Responses to electrical stimulation in sorcin experiments (Fig. 5) were represented in  $\Delta F$ , instead of  $\Delta F/F_0$ , to avoid artifact effects due the higher basal fluorescence, as previously indicated. As shown in Figure 5D, the mean amplitude of  $\text{Ca}^{2+}$  transients evoked with different stimulation frequencies did not



differ in the presence of sorcin (20 Hz trains: control =  $55 \pm 10$  A. U. (n = 8) – sorcin =  $54 \pm 10$  A. U. (n = 6); 40 Hz: control =  $105 \pm 21$  A. U. (n = 8) – sorcin =  $100 \pm 21$  A. U. (n = 6); 80 Hz: control =  $169 \pm 30$  A. U. (n = 8) – sorcin =  $164 \pm 34$  A. U. (n = 6) Mann-Whitney U test). In the presence of sorcin FWHM did not differ from the control (not shown). Interestingly, and despite unchanged  $\text{Ca}^{2+}$  signals, a strong reduction in synaptic currents of up to ~50% was observed with sorcin (Fig. 5E). The integral of these synaptic responses was calculated, obtaining average values with sorcin of  $11.1 \pm 2.8$  pC for the 20 Hz trains,  $26.5 \pm 4.0$  pC for 40 Hz, and  $38.4 \pm 5.1$  pC for 80 Hz trains (control values already mentioned above) (n = 6, p = 0.0293, Mann-Whitney U test for the 80 Hz trains). The reduction of synaptic currents produced by sorcin is most likely due to a reduction in the SK2 component of the response, since: i) at -100 mV both the nicotinic and SK2 components are inward, and ii)  $\alpha 9\alpha 10$  receptors response seems to be unchanged, according to  $\Delta F$  values in Figure 5D that are entirely due to the activation of the nicotinic receptors. Thus, even without affecting  $\text{Ca}^{2+}$  influx, sorcin produced a reduction in the efferent inhibitory action.

205

## 206 **$\text{Ca}^{2+}$ entry through L-type $\text{Ca}^{2+}$ channels**

$\text{Ca}^{2+}$  influx through VGCC was investigated applying step depolarizations of OHCs, from a holding potential of -100 mV, up to -30 - +30 mV. Representative  $\text{Ca}^{2+}$  transients are shown in Figure 6A, with maximum values that followed the expected bell-shaped dependence on membrane potential, peaking at +10/+20 mV (Fig. 6B).

Step depolarizations to +20 mV for 300 msec (same duration of MOC train stimulation in Figs. 3-5) evoked  $\text{Ca}^{2+}$  transients with an average peak of  $13.3 \pm 3.8$  %  $\Delta F/F_0$ , that unexpectedly matched in size with those obtained with 40 and 80 Hz trains of MOC stimulation (see Figs. 3C and 6C-E) (n = 8, p > 0.05 Friedman's test). Moreover, the spread of the fluorescence signal also resembled that observed with 40 and 80 Hz efferent trains ( $57 \pm 7$  % of OHC area, p > 0.05 Friedman's test).

Previous evidence indicates that type II afferents on OHCs are closely positioned with efferent synapses and sub-synaptic cisterns (Fuchs et al., 2014; Saito, 1980, 1990). A functional quantification of this proximity was evaluated by measuring the distance between locations of VGCC and MOC  $\text{Ca}^{2+}$  transients within a given cell (Fig. 6C and F). An average value of  $3.7 \pm 1.1$   $\mu\text{m}$  (n = 8) was estimated, ranging from 0.6 to 8.5  $\mu\text{m}$ , with 5/8 cells with values  $\leq 2$   $\mu\text{m}$ . The possibility of modulation of VGCC  $\text{Ca}^{2+}$  signals by cisterns is further investigated in the following section.

222

## 223 **Modulation of Ca<sup>2+</sup> influx through VGCC by ryanodine and sorcin**

224 Thapsigargin, ryanodine and dantrolene were used to evaluate the role of SERCA pumps and RyR in  
 225 modulating depolarization evoked Ca<sup>2+</sup> transients. Thapsigargin application in the bath did not produce  
 226 any change in the amplitude of the depolarization evoked Ca<sup>2+</sup> signal (Figs. 7A and B) (control  $\Delta F$ :  $68 \pm 24$  A. U., thapsigargin  $\Delta F$ :  $53 \pm 9$ ,  $n = 5$ ,  $p = 0.58$  Wilcoxon signed-rank test). At 1  $\mu M$  ryanodine, a  
 228 concentration that activates RyR, a strong potentiation of the Ca<sup>2+</sup> transient was observed, with average  
 229 peak values of  $15.8 \pm 3.5$  % $\Delta F/F_0$ , compared to control (vehicle)  $4.6 \pm 1.6$  % $\Delta F/F_0$  ( $n = 10$ ,  $p < 0.05$   
 230 Kruskal-Wallis test) (Figs. 7C and D). Neither 100  $\mu M$  ryanodine nor dantrolene showed any modula-  
 231 tory effect ( $12.6 \pm 6.5$  %  $\Delta F/F_0$  ( $n = 8$ ), and  $13.2 \pm 4.7$  % ( $n = 7$ ), respectively;  $p > 0.05$  Kruskal-Wallis  
 232 test).  
 233 Finally, the effect of sorcin on Ca<sup>2+</sup> transients produced by VGCC is shown in Figure 7E and F. A  
 234 strong tendency to a reduction in peak  $\Delta F$  values was observed (control:  $124.0 \pm 30.0$  A. U., sorcin:  
 235  $57.0 \pm 10.2$  A. U.  $n = 6$ ). However, due to the high variability observed in control experiments (range:  
 236 22-200 A. U.) this difference did not reach statistical significance ( $p = 0.228$ , Mann-Whitney U test).

## Discussion:

The present results provide a direct analysis of synaptic  $\text{Ca}^{2+}$  dynamics in OHCs during both MOC (efferent) and VGCC (afferent) activation. It also shows evidence for cisternal modulation of amplitude, spread and duration of  $\text{Ca}^{2+}$  transients. In addition, this study demonstrates for the first time a functional role for sorcin in OHCs, a  $\text{Ca}^{2+}$  binding protein with a well described role in regulating  $\text{Ca}^{2+}$  concentration in cardiomyocytes cytoplasm (Farrell et al., 2003).

The amplitude of  $\text{Ca}^{2+}$  transients shows a strong dependence on MOC stimulation at frequencies between 20 and 80 Hz (Fig. 3), which might explain the reported changes in MOC inhibitory strength as a function of stimulation rate (Art et al., 1984; Galambos, 1956; Gifford & Guinan, 1987). Significantly, only one  $\text{Ca}^{2+}$  hotspot was found per OHC, suggesting that a single MOC fiber could be stimulated at a time, although more are present (Liberman, 1990; Warr, 1992). A single  $\text{Ca}^{2+}$  spot was also observed when activating VGCC by step depolarizations, although multiple contacts with type II afferent coexist in one OHC within a close proximity (Fuchs & Glowatzki, 2015). How afferent synapses in OHCs are activated *in vivo* is still not known, but our experiments show that  $\text{Ca}^{2+}$  signals produced by VGCC are unexpectedly high, similar in amplitude to those through  $\alpha 9\alpha 10$ , and can be further potentiated by RyR action.

## $\text{Ca}^{2+}$ homeostasis in OHCs and efferent regulation

Several studies report alternative mechanisms that operate in OHCs to handle  $\text{Ca}^{2+}$  (Fettiplace & Nam, 2018). Millimolar concentrations of two different buffers are present in the cytoplasm of OHCs: oncomodulin (also known as parvalbumin- $\beta$ ) and calbindin-D28k, with the highest values observed at the base of the cells, where synaptic contacts reside (Hackney et al., 2005; Sakaguchi et al., 1998). In the oncomodulin knock-out mouse, a progressive OHCs loss is observed that leads to cochlear dysfunction (Tong et al., 2016). A similar phenomenon is observed in the knock-out of PMCA2  $\text{Ca}^{2+}$ -ATPases (Giacomello et al., 2011), that are responsible for pumping out  $\text{Ca}^{2+}$  ions that enter through MET channels even in quiet (Johnson et al., 2011; Tucker & Fettiplace, 1995; Yamoah et al., 1998). These results highlight the importance of  $\text{Ca}^{2+}$  handling in maintaining the integrity of OHCs and cochlear function. The control of  $\text{Ca}^{2+}$  diffusion is further exerted by mechanisms such as  $\text{Na}^{+}$ - $\text{Ca}^{2+}$  exchangers and mitochondrial uptake, although they both operate on a time scale of hundreds of milliseconds, slower than buffers and PMCA2 pumps (Beurg et al., 2010; Ikeda et al., 1992; Nicholls, 2005). In OHCs, mito-

chondria are abundantly found in a layer right below the cuticular plate, playing the important role of containing  $\text{Ca}^{2+}$  leak into the basolateral compartment of the cell (Beurg et al., 2010; Furness & Hackney, 2006). Similarly, on the basal pole of OHCs, the large cistern located in physical opposition to MOC vesicle releasing sites, would not only operate as a barrier to prevent free diffusion of  $\text{Ca}^{2+}$  entering through nicotinic receptors, but has the additional role of a ‘ $\text{Ca}^{2+}$  sponge’ that removes free ions out the cytoplasm and shorten synaptic responses (Fig. 4). Taking into account the tight functional coupling between  $\alpha 9\alpha 10$  and SK2 (Oliver et al., 2000) and the small cytoplasmic space between plasma and cisternal membranes (Fuchs et al., 2014), a relatively small  $\text{Ca}^{2+}$  influx would effectively produce synaptic inhibition through SK2 activation. However, since efferent fibers operate best at prolonged MOC activation (Brown, 1989; Robertson & Gummer, 1985), one could propose that cisterns function to control excessive  $\text{Ca}^{2+}$  spread and prevent its spill over. Evidence from Figure 4, using train stimulation to MOC fibers, suggests that cisterns are responsible not only for speeding up the decay of efferent  $\text{Ca}^{2+}$  but also limiting its spread. However, taking into account the volume of this small domain and the spread of the  $\text{Ca}^{2+}$  transients (Fig. 3F), it is very likely that  $\text{Ca}^{2+}$  signals evoked at high frequency MOC stimulation result, at least partially, from  $\text{Ca}^{2+}$  that escaped into the cytoplasm. A circumstance that may differ in conditions with more intact intracellular buffers concentrations.

Our results do not provide support for RyR participation during MOC activation within a rather wide range of stimulation strengths, 20 to 80 Hz trains of 300 msec of duration. It is possible though, that RyR are engaged during MOC activation only when a strong preceding hair cell excitation occurred, as suggested previously (Im et al., 2014; Zachary et al., 2018). Whether this phenomenon occurs *in vivo* remains to be proven, but is supported by the observation that MOC inhibition is potentiated by a preceding auditory stimulation, that could produce the required excitation to hair cells (Kujawa & Liberman, 1999).

## **$\text{Ca}^{2+}$ influx through VGCC and type II afferent activation**

$\text{Ca}^{2+}$  currents through VGCC in OHCs are several fold smaller than in IHCs and present a shift to the right in the current-voltage relation (Johnson & Marcotti, 2008; Knirsch et al., 2007; Wong et al., 2013). Accordingly,  $\text{Ca}^{2+}$  signals in Figure 6 peaked at +20 mV (-20 mV for IHCs), and their amplitudes are three-fold smaller (13.3 %  $\Delta\text{F}/\text{F}_0$ , with a 300 ms step) compared to brief depolarizations (20 msec) to sub-maximal potentials (-30 mV) in IHCs (42 %  $\Delta\text{F}/\text{F}_0$ ) (Moglie et al., 2018). Other features of afferent synapses in OHCs further indicate that the synaptic drive is small in these cells when compared to

IHCs. Ribbons in active zone areas with type II afferents are small, irregular in shape, and are surrounded by few vesicles (Fuchs & Glowatzki, 2015). However, our results show that  $\text{Ca}^{2+}$  transients elicited by VGCC were as large and spread out as  $\alpha 9\alpha 10$  transients (Figs. 3 and 6). This might indicate that, although smaller than in IHCs,  $\text{Ca}^{2+}$  transients through VGCC could be sufficient to evoke glutamate release onto type II afferent fibers. Moreover, these transients were further potentiated by RyR agonistic agents (Fig. 7). Whether RyRs mediating this effect are located in cisterns at synaptic (Grant et al., 2006; Lioudyno et al., 2004), or lateral wall locations (Grant et al., 2006; Ranum et al., 2019) is unknown. However, it suggests that CICR mechanisms can boost synaptic strength in contacts with type II afferents. CICR has been shown to modulate vesicle release and recruitment on afferent synapses of hair cells from frogs and turtles (Castellano-Muñoz et al., 2016; Lelli et al., 2003). Rod photoreceptors synapses are also modulated by this phenomenon, suggesting that CICR is not uncommon in ribbon synapses (Babai et al., 2010; Cadetti et al., 2006). In addition, ATP-induced  $\text{IP}_3$  mobilization and  $\text{Ca}^{2+}$  influx in the apical portion of isolated OHC, could further facilitate the  $\text{Ca}^{2+}$  spread down to synaptic sites (Ashmore & Ohmori, 1990; Mammano et al., 1999). This could explain the proposed function of type II neurons in pain sensation (Liu et al., 2015).

According to results in Figs. 4 and 7, SERCA pumps and RyR respond differently to afferent and efferent  $\text{Ca}^{2+}$  influx. One important question that arises is if, similarly to that described for immature IHCs (Moglie et al., 2018), OHCs cistern and buffering prevent  $\text{Ca}^{2+}$  spill-over from efferent to afferent synapses, particularly during sustained MOC activity. Both functional (Fig. 6E) and structural (Fuchs et al., 2014; Saito, 1990) evidence indicates that the diffusion interval between afferent and efferent synaptic locations is very short. This mechanism could operate in conjunction with VGCC to overcome an apparently weak synaptic drive in OHCs.

321

### 322 **Sorcin and $\text{Ca}^{2+}$ regulation in OHCs**

Transcriptome analysis has shown that gene products responsible for  $\text{Ca}^{2+}$  regulation, such as oncomodulin and sorcin, appear among the most highly represented mRNAs in OHCs (Li et al., 2018; Ranum et al., 2019). The high expression profile of oncomodulin agrees with previous reports showing a high concentration of the protein detected by immuno-EM (Hackney et al., 2005). Initially identified in drug-resistant cells, sorcin was later detected in cardiac myocytes, where it modulates CICR and excitation-contraction coupling in the heart (Colotti et al., 2014; Farrell et al., 2003; Lokuta et al., 1997; Meyers et al., 1995). Sorcin can also interact with, and regulate, other proteins responsible for  $\text{Ca}^{2+}$

homeostasis such as the  $\text{Na}^+$ - $\text{Ca}^{2+}$  exchanger (Zamparelli et al., 2010), L-type  $\text{Ca}^{2+}$  channels (Fowler et al., 2009; Meyers et al., 1998), and cisternal ATPases (Matsumoto et al., 2005). The present work shows for the first time a function for sorcin in  $\text{Ca}^{2+}$  modulation at the synaptic pole of the OHCs. Thus, the addition of sorcin into the OHCs cytoplasm caused an increase in the resting cytoplasmic  $\text{Ca}^{2+}$  concentration. One could propose that sorcin interacts with SERCA pumps located in sub-synaptic cisterns, inhibiting its action. However, this contrasts the reported role of sorcin on sarcoplasmic reticulum ATPases in the heart (Matsumoto et al., 2005). Interestingly, sorcin produced a reduction in the size of synaptic currents (calculated as integral, Q) during efferent stimulation (Fig. 5). In the same set of experiments  $\text{Ca}^{2+}$  transients were unaffected, implicating that sorcin does not affect  $\alpha 9\alpha 10$  function, as these receptors are the sole reported  $\text{Ca}^{2+}$  source at this synapse. Since the recording conditions used for MOC stimulation experiments ( $V_h = -100$  mV) were designed to maximize the  $\text{Ca}^{2+}$  driving force, part of the inward current triggered during synaptic events derives from SK2 channel activation. Thus, it is very likely that the sorcin mediated reduction of synaptic currents size is due to SK2 channels inhibition. One possible scenario is that sorcin operates as a sensor for  $\text{Ca}^{2+}$  influx through nicotinic receptors, curbing SK2 function to prevent over-inhibition by the MOC input. As indicated, sorcin would operate as a ‘brake’ for excessive RyR-mediated  $\text{Ca}^{2+}$  spread in cardiomyocytes (Farrell et al., 2003). It was recently suggested that sorcin could have a similar role in regulating  $\text{Ca}^{2+}$  originated from lateral walls cisterns of OHCs (Ranum et al., 2019), and thus, sorcin would operate as an electromotility modulator (Dallos et al., 1997; Frolenkov et al., 2000). Although further experiments are needed in order to decipher the role of sorcin in OHCs, the present results indicate a clear role for this novel protein in  $\text{Ca}^{2+}$  homeostasis.

## 351 **Methods**

### *Electrophysiological recordings from OHCs*

352 Euthanasia and tissue extraction were carried out according to approved animal protocols of INGEBI  
 353 Institutional Animal Care and Use Committee. Excised apical turns of 12- to 14-day-old mouse  
 354 cochleas (Balb/c, either sex) were placed into a chamber on the stage of an upright microscope (Olym-  
 355 pus BX51WI) and used within 2 hrs. OHCs were visualized on a monitor via a water immersion objec-  
 356 tive (60x), difference interference contrast optics and a CCD camera (Andor iXon 885). All recordings  
 357 were performed at room temperature (22–25°C). Due to the short viability of the cochlear preparation  
 358 and OHCs at this age, only one cell could be recorded per animal.

359 The cochlear preparation was superfused continuously at 2–3 ml/min with extracellular saline solution  
 360 of an ionic composition similar to that of the perilymph (in mM): 144 NaCl, 5.8 KCl, 1.3 CaCl<sub>2</sub>, 0.7  
 361 NaH<sub>2</sub>PO<sub>4</sub>, 5.6 D-glucose, 10 HEPES buffer, 2 Pyruvate, 3 myo-inositol, pH 7.4. Working solutions con-  
 362 taining different drugs were made up in this same saline and delivered through the perfusion system.  
 363 Recording pipettes were fabricated from 1-mm borosilicate glass (WPI), with tip resistances of 6–8  
 364 MΩ. Series resistance errors were not compensated for.

365 For all experiments, the basic pipette solution was made from a 1.25X stock to reach a final concentra-  
 366 tion of (in mM): 95 KCl, 40 K-ascorbate, 5 HEPES, 2 pyruvate, 6 MgCl<sub>2</sub>, 5 Na<sub>2</sub>ATP, 10 Phosphocrea-  
 367 tine-Na<sub>2</sub>, 0.5 EGTA and 0.4 Ca<sup>2+</sup> indicator (Fluo-4), pH 7.2. To avoid variations in OHCs volume dur-  
 368 ing experiments, pressure in the recording system was controlled with a digital manometer and kept  
 369 within 5-9 cm H<sub>2</sub>O range.

370 Heterologous expression and purification of human sorcin was performed as described in Meyers *et al.*  
 371 (1995), with minimal adaptations. PET23d-Sorcin-wt was obtained from Dr. Gianni Colotti, was trans-  
 372 formed into *Escherichia coli* BL21 (DE3) codon plus pLysS. Bacteria were growth in LB containing 5  
 373 mM CaCl<sub>2</sub> until OD<sub>600</sub> = 0.5, when 1 mM isopropylthiogalactoside (IPTG) was added and further in-  
 374 cubated for 2 hours. Cells were harvested by centrifugation and washed with Lysis buffer (10 mM Tris-  
 375 HCl, 10 mM NaCl, pH=7.5), followed by sonication (Sonication buffer: Lysis buffer with 1 mM DTT  
 376 and antiproteases). Lysate was washed and resuspended in Sonication buffer plus 5mM MgCl<sub>2</sub> and 0.2  
 377 µg DNase (Fermentas). Following centrifugation, the supernatant was loaded into a Sep-Pak Accell  
 378 Plus QMA cartridge (Waters), pre-equilibrated with Sonication buffer. Following a 5-step elution with  
 379 50, 150, 250, 400 and 500mM NaCl (2 ml each), SDS-PAGE revealed that most sorcin eluted in the  
 380 150 and 250 mM fractions. Samples were pooled in G2 dialysis cassettes (3500 MWCO, Thermo Sci-



entific) and dialyzed twice for 12 hours at 4°C against 1 liter of (106.25 KCl, 6.25 HEPES, 2.5 Pyruvate and 7.5 MgCl<sub>2</sub>). After dialysis, samples were concentrated using Vivaspins devices (3000 MWCO, Cytiva) and protein concentration was estimated by the Bradford assay.

Stock solutions of dantrolene, thapsigargin and ryanodine (both at 1 and 100 μM) were prepared in DMSO and added to the intracellular solution, such that the concentration of DMSO in the pipette solution was 0.5 % v/v in every case. All salts and drugs were acquired from SIGMA except for ryanodine, dantrolene and thapsigargin which were purchased from Tocris.

Efferent synaptic currents were evoked by unipolar electrical stimulation of the MOC efferent axons as described previously (Ballesteros et al., 2011; Goutman et al., 2005). Briefly, the electrical stimulus was delivered via a 20 to 80 μm-diameter glass pipette which position was adjusted until postsynaptic currents in OHCs were consistently activated. An electrically isolated constant current source (model DS3, Digitimer) was triggered via the data-acquisition computer to generate pulses of 40 to 220 μA, 1 msec width. Solutions containing acetylcholine (ACh) were applied by a gravity-fed multichannel glass pipette (150 μm tip diameter).

Electrophysiological recordings were performed using a Multiclamp 700B amplifier (Molecular Devices), low-pass filtered at 6 kHz and digitized at 50 kHz via a National Instruments board. Data was acquired using WinWCP (J. Dempster, University of Strathclyde). To maximize Ca<sup>2+</sup> driving force during imaging experiments, OHCs were voltage clamped at -100 mV, but only during a brief period of time when stimulation was applied and synaptic responses were recorded (650 msec in paired pulse experiments, and 2 sec in trains). Otherwise, cells were held at -40 mV. Electric shocks to MOC fibers were separated by intervals of 5 sec in paired pulse experiments, and 30 sec for trains. Recordings were analyzed with custom-written routines in IgorPro 6.37 (Wavemetrics). Statistical analysis was performed using Infostat (Universidad Nacional de Córdoba).

#### Ca<sup>2+</sup> Imaging Experiments

Ca<sup>2+</sup> indicators were included in the patch-pipettes (at the concentration indicated before) allowing the diffusion into the cells. The preparation was illuminated with a blue LED system (Tolket, Argentina) and images were acquired using an Andor iXon 885 camera controlled through a Till Photonics interface system. The focal plane was set close to the basal pole of OHCs where synapses are found. The signal-to-noise ratio was improved with an on-chip binning of 4x4, giving a resolution of 0.533 μm per pixel with the 60X water immersion objective. The image size was set to 50x50 pixels which allowed an acquisition rate of 140 frames/sec. Image acquisition started 5 min after whole-cell break in to en-



412 sure the proper dialysis of the cell content and lasted up to 45 min. Images were analyzed with custom-  
 413 written routines in IgorPro 6.37 (Wavemetrics).

414 A time lapse consisting of 250 images were taken for each experiment. An averaged image in each time  
 415 lapse was used to determine the edge of the cell by an automatic thresholding algorithm. Within the cell  
 416 borders, a donut-shaped mask covering the cell's cytoplasm was defined comprising 40 to 90% of the  
 417 maximal fluorescence signal. The mask was divided in 24 radial regions of interest (ROIs) with its cen-  
 418 ter set at the maximal intensity pixel of the cell. Fluorescence intensity was measured in every ROI for  
 419 each time frame. Two criteria were used to determine that a successful synaptic  $\text{Ca}^{2+}$  event occurred at a  
 420 particular ROI: i) a fluorescence peak was identified right after the MOC stimulus, with 2.5x higher  
 421 amplitude than the standard deviation of the baseline fluorescence; and ii) the area under the curve (flu-  
 422 orescence trace) was larger than 0.11 (A. U. \* sec). Finally, those ROIs that exhibited a consistent pat-  
 423 tern of activation were selected as hotspots and used for further analysis of the fluorescence signal.

424 Photobleaching was corrected for long acquisition protocols by fitting a line between pre-stimulus  
 425 baseline and final fluorescence.

426 To determine the spread of the fluorescence change across the OHC cytoplasm, the response image  
 427 when the fluorescence signal peaked was normalized to pre-stimulus fluorescence. Then, it was thresh-  
 428 olded by fitting a bimodal distribution to the image histogram and the area and center of mass of the re-  
 429 sulting mask calculated. Signal spread area was divided by the cell total area for comparison. The cen-  
 430 ter of mass was used to determine the distance between afferent and efferent  $\text{Ca}^{2+}$  entry sites.

## 431 **Acknowledgements**

432 Maryline Beurg for advice on the use of ascorbic acid in the intracellular solution, and Joe Santos-Sac-  
433 chi on OHCs recordings. Gianni Colotti for kindly sharing the plasmid vector for sorcin production,  
434 and J. Dempster for the use of WinWCP. Paul A. Fuchs for comments on the manuscript.

435 Funding: Agencia Nacional de Promoción Científica y Tecnológica (PICT 2016-2155 to JDG), NIH  
436 Grant R01 DC001508 (PAF and ABE).

437

438

439

## 440 **Competing interests**

441 The authors declare no commercial interest

## 442 References

443

- 444 Art, J. J., Fettiplace, R., & Fuchs, P. A. (1984). Synaptic hyperpolarization and inhibition of turtle cochlear hair cells. *The*  
445 *Journal of Physiology*, 356(1), 525–550. <https://doi.org/10.1113/jphysiol.1984.sp015481>
- 446 Ashmore, J. F., & Ohmori, H. (1990). Control of intracellular calcium by ATP in isolated outer hair cells of the guinea-pig  
447 cochlea. *The Journal of Physiology*, 428, 109–131.
- 448 Babai, N., Morgans, C. W., & Thoreson, W. B. (2010). Calcium-induced calcium release contributes to synaptic release  
449 from mouse rod photoreceptors. *Neuroscience*, 165(4), 1447–1456. [https://doi.org/10.1016/](https://doi.org/10.1016/j.neuroscience.2009.11.032)  
450 [j.neuroscience.2009.11.032](https://doi.org/10.1016/j.neuroscience.2009.11.032)
- 451 Ballesterio, J., Zorrilla de San Martín, J., Goutman, J. D., Elgoyhen, A. B., Fuchs, P. A., & Katz, E. (2011). Short-term  
452 synaptic plasticity regulates the level of olivocochlear inhibition to auditory hair cells. *The Journal of Neuroscience*,  
453 31(41), 14763–14774. <https://doi.org/10.1523/JNEUROSCI.6788-10.2011>
- 454 Beurg, M., Fettiplace, R., Nam, J., & Ricci, A. J. (2009). Localization of inner hair cell mechanotransducer channels using  
455 high-speed calcium imaging. *Nature Neuroscience*, 12(5), 553–558. <https://doi.org/10.1038/nn.2295>
- 456 Beurg, M., Nam, J. H., Chen, Q., & Fettiplace, R. (2010). Calcium balance and mechanotransduction in rat cochlear hair  
457 cells. *Journal of Neurophysiology*, 104(1), 18–34. <https://doi.org/10.1152/jn.00019.2010>
- 458 Beurg, M., Safieddine, S., Roux, I., Bouleau, Y., Petit, C., & Dulon, D. (2008). Calcium- and Otoferlin-Dependent Exocyto-  
459 sis by Immature Outer Hair Cells. *The Journal of Neuroscience*, 28(8), 1798–1803. [https://doi.org/10.1523/JNEU-](https://doi.org/10.1523/JNEUROSCI.4653-07.2008)  
460 [ROSCI.4653-07.2008](https://doi.org/10.1523/JNEUROSCI.4653-07.2008)
- 461 Brown, M. C. (1989). Morphology and response properties of single olivocochlear fibers in the guinea pig. *Hearing Re-*  
462 *search*, 40(1–2), 93–109. [https://doi.org/10.1016/0378-5955\(89\)90103-2](https://doi.org/10.1016/0378-5955(89)90103-2)
- 463 Cadetti, L., Bryson, E. J., Ciccone, C. A., Rabl, K., & Thoreson, W. B. (2006). Calcium-induced calcium release in rod pho-  
464 toreceptor terminals boosts synaptic transmission during maintained depolarization. *European Journal of Neuro-*  
465 *science*, 23(11), 2983–2990. <https://doi.org/10.1111/j.1460-9568.2006.04845.x>
- 466 Castellano-Muñoz, M., Schnee, M. E., & Ricci, A. J. (2016). Calcium-induced calcium release supports recruitment of  
467 synaptic vesicles in auditory hair cells. *Journal of Neurophysiology*, 115, 226–239. [https://doi.org/10.1152/](https://doi.org/10.1152/jn.00559.2015)  
468 [jn.00559.2015](https://doi.org/10.1152/jn.00559.2015)
- 469 Chen, Q., Mahendrasingam, S., Tickle, J. A., Hackney, C. M., Furness, D. N., & Fettiplace, R. (2012). The development,  
470 distribution and density of the plasma membrane calcium ATPase 2 calcium pump in rat cochlear hair cells. *European*  
471 *Journal of Neuroscience*, 36(3), 2302–2310. <https://doi.org/10.1111/j.1460-9568.2012.08159.x>
- 472 Colotti, G., Poser, E., Fiorillo, A., Genovese, I., Chiarini, V., & Ilari, A. (2014). Sorcin, a calcium binding protein involved  
473 in the multidrug resistance mechanisms in cancer cells. *Molecules*, 19(9), 13976–13989. [https://doi.org/10.3390/mole-](https://doi.org/10.3390/molecules190913976)  
474 [cules190913976](https://doi.org/10.3390/molecules190913976)
- 475 Dallos, P., He, D. Z. Z., Lin, X., Mehta, S., & Evans, B. N. (1997). Acetylcholine, Outer Hair Cell Electromotility, and the  
476 Cochlear Amplifier. *The Journal of Neuroscience*, 17(6), 2212–2226.

477 Dumont, R. A., Lins, U., Filoteo, A. G., Penniston, J. T., Kachar, B., & Gillespie, P. G. (2001). Plasma membrane  $\text{Ca}^{2+}$ -  
478 ATPase isoform 2a is the PMCA of hair bundles. *Journal of Neuroscience*, 21(14), 5066–5078. [https://doi.org/](https://doi.org/10.1523/jneurosci.21-14-05066.2001)  
479 10.1523/jneurosci.21-14-05066.2001

480 Elgoyhen, A. B., Johnson, D. S., Boulter, J., Vetter, D. E., & Heinemann, S. F. (1994). Alpha 9: an acetylcholine receptor  
481 with novel pharmacological properties expressed in rat cochlear hair cells. *Cell*, 79(4), 705–715. [https://doi.org/0092-](https://doi.org/10.1016/0092-8674(94)90555-X)  
482 8674(94)90555-X [pii]

483 Elgoyhen, A. B., Vetter, D. E., Katz, E., Rothlin, C. V., Heinemann, S. F., & Boulter, J. (2001). alpha10: a determinant of  
484 nicotinic cholinergic receptor function in mammalian vestibular and cochlear mechanosensory hair cells. *Proceedings*  
485 *of the National Academy of Sciences of the United States of America*, 98(6), 3501–3506. [https://doi.org/10.1073/](https://doi.org/10.1073/pnas.051622798)  
486 pnas.051622798

487 Engström, H. (1958). On the double innervation of the sensory epithelia of the inner ear. *Acta Oto-Laryngologica*, 49(1),  
488 109–118. <https://doi.org/10.3109/00016485809134734>

489 Evans, M. G., Lagostena, L., Darbon, P., & Mammano, F. (2000). Cholinergic control of membrane conductance and intra-  
490 cellular free  $\text{Ca}^{2+}$  in outer hair cells of the guinea pig cochlea. *Cell Calcium*, 28(3), 195–203. [https://doi.org/10.1054/](https://doi.org/10.1054/ceca.2000.0145)  
491 ceca.2000.0145 S0143-4160(00)90145-3 [pii]

492 Farrell, E. F., Antaramian, A., Rueda, A. A., Gómez, A. M., & Valdivia, H. H. (2003). Sorcin Inhibits Calcium Release and  
493 Modulates Excitation-Contraction Coupling in the Heart. *Journal of Biological Chemistry*, 278(36), 34660–34666.  
494 <https://doi.org/10.1074/jbc.M305931200>

495 Fettiplace, R., & Nam, J.-H. (2018). Tonotopy in calcium homeostasis and vulnerability of cochlear hair cells. *Hearing Re-*  
496 *search*, xxxx. <https://doi.org/10.1016/J.HEARES.2018.11.002>

497 Flores, E. N., Duggan, A., Madathany, T., Hogan, A. K., Márquez, F. G., Kumar, G., Seal, R. P., Edwards, R. H., Liberman,  
498 M. C., & García-Añoveros, J. (2015). A non-canonical pathway from cochlea to brain signals tissue-damaging noise.  
499 *Current Biology*, 25(5), 606–612. <https://doi.org/10.1016/j.cub.2015.01.009>

500 Fowler, M. R., Colotti, G., Chiancone, E., Higuchi, Y., Seidler, T., & Smith, G. L. (2009). Complex modulation of L-type  
501  $\text{Ca}^{2+}$  current inactivation by sorcin in isolated rabbit cardiomyocytes. *Pflügers Archiv European Journal of Physiol-*  
502 *ogy*, 457(5), 1049–1060. <https://doi.org/10.1007/s00424-008-0575-5>

503 Frolenkov, G. I., Mammano, F., Belyantseva, I. A., Coling, D., & Kachar, B. (2000). Two distinct  $\text{Ca}^{2+}$ -dependent signal-  
504 ing pathways regulate the motor output of cochlear outer hair cells. *The Journal of Neuroscience*, 20(16), 5940–5948.  
505 [https://doi.org/20/16/5940](https://doi.org/10.1523/JNEUROSCI.2016-99.2000) [pii]

506 Fuchs, P. A. (1996). Synaptic transmission at vertebrate hair cells. *Curr Opin Neurobiol*, 6(4), 514–519. [https://doi.org/](https://doi.org/10.1016/S0959-4388(96)80058-4)  
507 S0959-4388(96)80058-4 [pii]

508 Fuchs, P. A., & Glowatzki, E. (2015). Synaptic studies inform the functional diversity of cochlear afferents. *Hearing Re-*  
509 *search*, 330, 18–25. <https://doi.org/10.1016/j.heares.2015.09.007>

510 Fuchs, P. A., Lehar, M., & Hiel, H. (2014). Ultrastructure of cisternal synapses on outer hair cells of the mouse cochlea.  
511 *Journal of Comparative Neurology*, 522(3), 717–729. <https://doi.org/10.1002/cne.23478>

512 Furness, D. N., & Hackney, C. M. (2006). The structure and composition of the stereociliary bundle of vertebrate hair cells.  
513 In *Springer Handbook of Auditory Research. Vertebrate hair cells*. Springer US.

514 Galambos, R. (1956). Suppression of auditory nerve activity by stimulation of efferent fibers to cochlea. *Journal of Neuro-*  
515 *physiology*, 19(5), 424–437.

516 Giacomello, M., de Mario, A., Lopreiato, R., Primerano, S., Campeol, M., Brini, M., & Carafoli, E. (2011). Mutations in  
517 PMCA2 and hereditary deafness: A molecular analysis of the pump defect. *Cell Calcium*, 50(6), 569–576. <https://doi.org/10.1016/j.ceca.2011.09.004>  
518

519 Gifford, M. L., & Guinan, J. J. (1987). Effects of electrical stimulation of medial olivocochlear neurons on ipsilateral and  
520 contralateral cochlear responses. *Hearing Research*, 29(2–3), 179–194. [https://doi.org/10.1016/0378-5955\(87\)90166-](https://doi.org/10.1016/0378-5955(87)90166-3)  
521 3

522 Gómez-Casati, M. E., Fuchs, P. A., Elgoyhen, A. B., & Katz, E. (2005). Biophysical and pharmacological characterization  
523 of nicotinic cholinergic receptors in rat cochlear inner hair cells. *The Journal of Physiology*, 566(Pt 1), 103–118.  
524 <https://doi.org/10.1113/jphysiol.2005.087155>

525 Goutman, J. D., Fuchs, P. A., & Glowatzki, E. (2005). Facilitating efferent inhibition of inner hair cells in the cochlea of the  
526 neonatal rat. *The Journal of Physiology*, 566(Pt 1), 49–59. <https://doi.org/10.1113/jphysiol.2005.087460> [pii] 10.1113/jphysiol.2005.087460  
527

528 Grant, L., Slapnick, S., Kennedy, H. J., & Hackney, C. M. (2006). Ryanodine receptor localisation in the mammalian  
529 cochlea: an ultrastructural study. *Hearing Research*, 219(1–2), 101–109. <https://doi.org/10.1016/j.heares.2006.06.002> [pii] 10.1016/j.heares.2006.06.002  
530

531 Guinan, J. J. (1996). Physiology of Olivocochlear Efferents. In R. R. F. and A. N. P. Peter Dallos (Ed.), *The Cochlea* (Vol.  
532 8). Springer-Verlag New York, Inc.

533 Guinan, J. J. (2006). Olivocochlear Efferents : Anatomy , Physiology , Function , and the Measurement of Efferent Effects  
534 in Humans. *Ear & Hearing*, 27(6), 589–607.

535 Hackney, C. M., Mahendrasingam, S., Penn, A., & Fettiplace, R. (2005). The Concentrations of Calcium Buffering Proteins  
536 in Mammalian Cochlear Hair Cells. *Journal of Neuroscience*, 25(34), 7867–7875. <https://doi.org/10.1523/JNEUROSCI.1196-05.2005>  
537

538 Ikeda, K., Saito, Y., Nishiyama, A., & Takasaka, T. (1992). Na<sup>+</sup>-Ca<sup>2+</sup> exchange in the isolated cochlear outer hair cells of  
539 the guinea-pig studied by fluorescence image microscopy. *European Journal of Physiology*, 420(5–6), 493–499.  
540 <https://doi.org/10.1007/BF00374624>

541 Im, G. J., Moskowitz, H. S., Lehar, M., Hiel, H., & Fuchs, P. A. (2014). Synaptic Calcium Regulation in Hair Cells of the  
542 Chicken Basilar Papilla. *The Journal of Neuroscience*, 34(50), 16688–16697. <https://doi.org/10.1523/JNEUROSCI.2615-14.2014>  
543

544 Johnson, S. L., Beurg, M., Marcotti, W., & Fettiplace, R. (2011). Prestin-driven cochlear amplification is not limited by the  
545 outer hair cell membrane time constant. *Neuron*, 70(6), 1143–1154. <https://doi.org/10.1016/j.neuron.2011.04.024>  
546

547 Johnson, S. L., & Marcotti, W. (2008). Biophysical properties of CaV1.3 calcium channels in gerbil inner hair cells. *The*  
548 *Journal of Physiology*, 586(4), 1029–1042. <https://doi.org/10.1113/jphysiol.2007.145219> [pii] 10.1113/jphysiol.2007.145219

549 Knirsch, M., Brandt, N., Braig, C., Kuhn, S., Hirt, B., Münkner, S., Knipper, M., & Engel, J. (2007). Persistence of Ca(v)1.3  
550 Ca<sup>2+</sup> channels in mature outer hair cells supports outer hair cell afferent signaling. *The Journal of Neuroscience*,  
551 27(24), 6442–6451. <https://doi.org/10.1523/JNEUROSCI.5364-06.2007>

552 Kujawa, S. G., & Liberman, M. C. (1999). Long-term sound conditioning enhances cochlear sensitivity. *Journal of Neuro-*  
553 *physiology*, 82(2), 863–873. <https://doi.org/10.1152/jn.1999.82.2.863>

554 Lelli, A., Perin, P., Martini, M., Ciubotaru, C. D., Prigioni, I., Valli, P., Rossi, M. L., & Mammano, F. (2003). Presynaptic  
555 calcium stores modulate afferent release in vestibular hair cells. *Journal of Neuroscience*, 23(17), 6894–6903. <https://doi.org/10.1523/jneurosci.23-17-06894.2003>  
556

557 Li, Y., Liu, H., Giffen, K. P., Chen, L., Beisel, K. W., & He, D. Z. Z. (2018). Transcriptomes of cochlear inner and outer hair  
558 cells from adult mice. *Scientific Data*, 5, 1–12. <https://doi.org/10.1038/sdata.2018.199>

559 Liberman, M. C. (1988). Physiology of cochlear efferent and afferent neurons: Direct comparisons in the same animal.  
560 *Hearing Research*, 34(2), 179–191. [https://doi.org/10.1016/0378-5955\(88\)90105-0](https://doi.org/10.1016/0378-5955(88)90105-0)

561 Liberman, M. C. (1990). Effects of chronic cochlear de-efferentation on auditory-nerve response. *Hearing Research*, 49(1–  
562 3), 209–223. [https://doi.org/10.1016/0378-5955\(90\)90105-X](https://doi.org/10.1016/0378-5955(90)90105-X)

563 Lioudyno, M. I., Hiel, H., Kong, J., Katz, E., Waldman, E., Parameshwaran-Iyer, S., Glowatzki, E., & Fuchs, P. A. (2004). A  
564 “synaptoplasmic cistern” mediates rapid inhibition of cochlear hair cells. *The Journal of Neuroscience*, 24(49),  
565 11160–11164. <https://doi.org/10.1523/JNEUROSCI.3674-04.2004>

566 Liu, C., Glowatzki, E., & Fuchs, P. A. (2015). Unmyelinated type II afferent neurons report cochlear damage. *Proceedings*  
567 *of the National Academy of Sciences*, 112(47), 14723–14727. <https://doi.org/10.1073/pnas.1515228112>

568 Lokuta, A. J., Meyers, M. B., Sander, P. R., Fishman, G. I., & Valdivia, H. H. (1997). Modulation of cardiac ryanodine re-  
569 ceptors by Sorcin. *Journal of Biological Chemistry*, 272(40), 25333–25338. <https://doi.org/10.1074/jbc.272.40.25333>

570 Mammano, F., Frolenkov, G. I., Lagostena, L., Belyantseva, I. A., Kurc, M., Dodane, V., Colavita, A., & Kachar, B. (1999).  
571 ATP-induced Ca<sup>2+</sup> release in cochlear outer hair cells: Localization of an inositol triphosphate-gated Ca<sup>2+</sup> store to the  
572 base of the sensory hair bundle. *Journal of Neuroscience*, 19(16), 6918–6929. <https://doi.org/10.1523/jneurosci.19-16-06918.1999>  
573

574 Matsumoto, T., Hisamatsu, Y., Ohkusa, T., Inoue, N., Sato, T., Suzuki, S., Ikeda, Y., & Matsuzaki, M. (2005). Sorcin inter-  
575 acts with sarcoplasmic reticulum Ca<sup>2+</sup>-ATPase and modulates excitation-contraction coupling in the heart. *Basic Re-*  
576 *search in Cardiology*, 100(3), 250–262. <https://doi.org/10.1007/s00395-005-0518-7>

577 Meyers, M. B., Puri, T. S., Chien, A. J., Gao, T., Hsu, P. H., Hosey, M. M., & Fishman, G. I. (1998). Sorcin associates with  
578 the pore-forming subunit of voltage-dependent L-type Ca<sup>2+</sup> channels. *Journal of Biological Chemistry*, 273(30),  
579 18930–18935. <https://doi.org/10.1074/jbc.273.30.18930>

580 Meyers, M. B., Zamparelli, C., Verzili, D., Dicker, A. P., Blanck, T. J. J., & Chiancone, E. (1995). Calcium-dependent  
581 translocation of sorcin to membranes: functional relevance in contractile tissue. *FEBS Letters*, 357(3), 230–234.  
582 [https://doi.org/10.1016/0014-5793\(94\)01338-2](https://doi.org/10.1016/0014-5793(94)01338-2)

583 Moglie, M. J., Fuchs, P. A., Elgoyhen, A. B., & Goutman, J. D. (2018). Compartmentalization of antagonistic Ca<sup>2+</sup> signals  
584 in developing cochlear hair cells. *Proceedings of the National Academy of Sciences of the United States of America*,  
585 115(9), E2095–E2104. <https://doi.org/10.1073/pnas.1719077115>

586 Nicholls, D. G. (2005). Mitochondria and calcium signaling. *Cell Calcium*, 38, 311–317. <https://doi.org/10.1016/j.ceca.2005.06.011>  
587

588 Oliver, D., Klocker, N., Schuck, J., Baukrowitz, T., Ruppersberg, J. P., & Fakler, B. (2000). Gating of Ca<sup>2+</sup>-activated K<sup>+</sup>  
589 channels controls fast inhibitory synaptic transmission at auditory outer hair cells. *Neuron*, 26(3), 595–601. [https://doi.org/10.1016/S0896-6273\(00\)81197-6](https://doi.org/10.1016/S0896-6273(00)81197-6) [pii]  
590

591 Ranum, P. T., Goodwin, A. T., Yoshimura, H., Kolbe, D. L., Walls, W. D., Koh, J. Y., He, D. Z. Z., & Smith, R. J. H. (2019).  
592 Insights into the Biology of Hearing and Deafness Revealed by Single-Cell RNA Sequencing. *Cell Reports*, 26(11),  
593 3160–3171.e3. <https://doi.org/10.1016/j.celrep.2019.02.053>



594 Robertson, D., & Gummer, M. (1985). Physiological and morphological characterization of efferent neurones in the guinea  
595 pig cochlea. *Hearing Research*, 20, 63–77.

596 Saito, K. (1980). Fine structure of the sensory epithelium of the guinea pig organ of corti: afferent and efferent synapses of  
597 hair cells. *Journal of Ultrastructure Research*, 71(2), 222–232. [https://doi.org/10.1016/S0022-5320\(80\)90108-2](https://doi.org/10.1016/S0022-5320(80)90108-2)

598 Saito, K. (1990). Freeze-Fracture Organization of Hair Cell Synapses in the Sensory Epithelium of Guinea Pig Organ of  
599 Corti. *Journal of Electron Microscopy Technique*, 15, 173–186.

600 Sakaguchi, N., Henzl, M. T., Thalmann, I., Thalmann, R., & Schulte, B. A. (1998). Oncomodulin is expressed exclusively  
601 by outer hair cells in the organ of Corti. *Journal of Histochemistry and Cytochemistry*, 46(1), 29–39. [https://doi.org/](https://doi.org/10.1177/002215549804600105)  
602 10.1177/002215549804600105

603 Smith, C. A., & Sjöstrand, F. S. (1961). Structure of the nerve endings on the external hair cells of the guinea pig cochlea as  
604 studied by serial sections. *Journal of Ultrastructure Research*, 5(6), 523–556. [https://doi.org/10.1016/S0022-](https://doi.org/10.1016/S0022-5320(61)80025-7)  
605 5320(61)80025-7

606 Sridhar, T. S., Brown, M. C., & Sewell, W. F. (1997). Unique Postsynaptic Signaling at the Hair Cell Efferent Synapse Per-  
607 mits Calcium to Evoke Changes on Two Time Scales. *The Journal of Neuroscience*, 17(1), 428–437.

608 Tong, B., Hornak, A. J., Maison, S. F., Ohlemiller, K. K., Liberman, M. C., & Simmons, D. D. (2016). Oncomodulin, an EF-  
609 hand Ca<sup>2+</sup> buffer, is critical for maintaining cochlear function in mice. *Journal of Neuroscience*, 36(5), 1631–1635.  
610 <https://doi.org/10.1523/JNEUROSCI.3311-15.2016>

611 Tucker, T., & Fettiplace, R. (1995). Confocal Imaging of Calcium Microdomains and Calcium Extrusion in Turtle Hair  
612 Cells. *Neuron*, 15(6), 1323–1335. [https://doi.org/10.1016/0896-6273\(95\)90011-X](https://doi.org/10.1016/0896-6273(95)90011-X)

613 Vattino, L. G., Wedemeyer, C., Elgoyhen, A. B., & Katz, E. (2020). Functional Postnatal Maturation of the Medial Olivo-  
614 cochlear Efferent – Outer Hair Cell Synapse. *The Journal of Neuroscience*, 40(25), 4842–4857.

615 Warr, W. B. (1992). Organization of the olivocochlear efferent system in mammals. In D. B. Webster, A. N. Popper, & R. R.  
616 Fay (Eds.), *The Mammalian Auditory Pathway: Neuroanatomy*. Springer-Verlag.

617 Weisstaub, N., Vetter, D. E., Elgoyhen, A. B., & Katz, E. (2002). The alpha9alpha10 nicotinic acetylcholine receptor is per-  
618 meable to and is modulated by divalent cations. *Hearing Research*, 167(1–2), 122–135. [https://doi.org/](https://doi.org/S0378595502003805)  
619 S0378595502003805 [pii]

620 Wong, A. B., Jing, Z., Rutherford, M. A., Frank, T., Strenzke, N., Moser, T., Rutherford, M. A., Frank, T., Strenzke, N., &  
621 Moser, T. (2013). Concurrent maturation of inner hair cell synaptic Ca<sup>2+</sup> influx and auditory nerve spontaneous activ-  
622 ity around hearing onset in mice. *The Journal of Neuroscience*, 33(26), 10661–10666. [https://doi.org/10.1523/JNEU-](https://doi.org/10.1523/JNEUROSCI.1215-13.2013)  
623 ROSCI.1215-13.2013

624 Yamoah, E. N., Lumpkin, E. A., Dumont, R. A., Smith, P. J. S., Hudspeth, A. J., & Gillespie, P. G. (1998). Plasma mem-  
625 brane Ca<sup>2+</sup>-ATPase extrudes Ca<sup>2+</sup> from hair cell stereocilia. *Journal of Neuroscience*, 18(2), 610–624. [https://](https://doi.org/10.1523/jneurosci.18-02-00610.1998)  
626 doi.org/10.1523/jneurosci.18-02-00610.1998

627 Zachary, S., Nowak, N., Vyas, P., Bonanni, L., & Fuchs, P. A. (2018). Voltage-gated calcium influx modifies cholinergic in-  
628 hibition of inner hair cells in the immature rat cochlea. *Journal of Neuroscience*, 38(25), 5677–5687. [https://doi.org/](https://doi.org/10.1523/JNEUROSCI.0230-18.2018)  
629 10.1523/JNEUROSCI.0230-18.2018

630 Zamparelli, C., Macquaide, N., Colotti, G., Verzili, D., Seidler, T., Smith, G. L., & Chiancone, E. (2010). Activation of the  
631 cardiac Na<sup>+</sup>-Ca<sup>2+</sup> exchanger by sorcin via the interaction of the respective Ca<sup>2+</sup>-binding domains. *Journal of Molecular*  
632 *and Cellular Cardiology*, 49(1), 132–141. <https://doi.org/10.1016/j.yjmcc.2010.03.003>

## Figures and figure legends

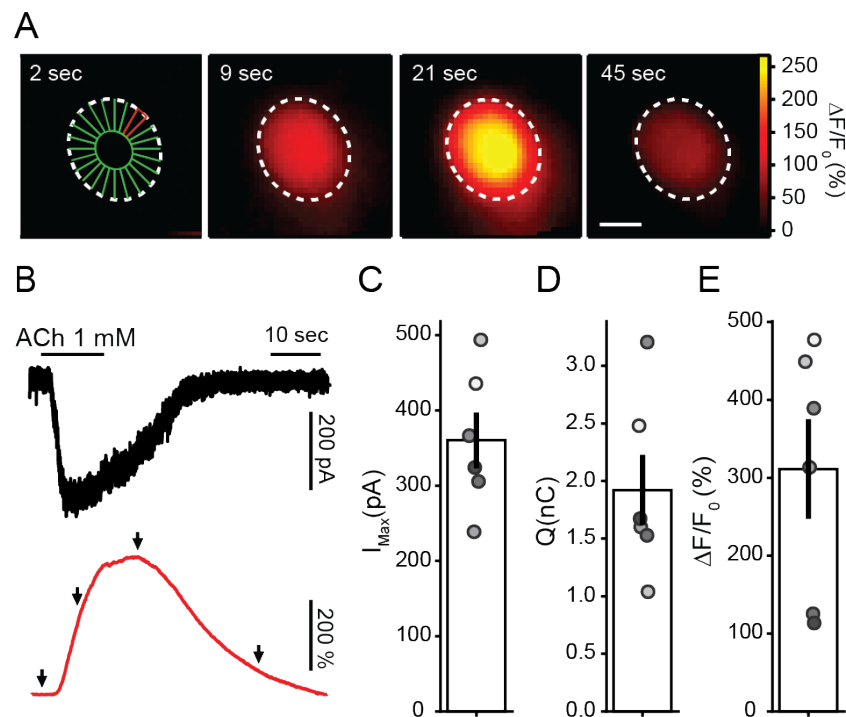

**Figure 1.** ACh evokes global  $Ca^{2+}$  transients in OHCs. A) Sequence of wide-field microscopy images of an OHC loaded with Fluo-4 and illuminated with 488 nm LED light during ACh 1mM perfusion. Dotted white lines represent the outer margin of the OHC's fluorescence signal. First image shows ROI design scheme in which the cell's cytoplasm was divided in 24 radial ROIs (see Methods). Scale bar: 5  $\mu$ m. B) Black trace corresponds to the whole-cell current recorded during ACh perfusion ( $V_{hold} = -100$ mV) and red trace to the  $\Delta F/F_0$  signal measured at the ROI depicted in red on panel A. Arrows indicate the time points of images shown on panel A. C-E) Peak current (C), charge (D), and maximal  $\Delta F/F_0$  (E) during ACh perfusion. Bar plots are mean  $\pm$  SEM.



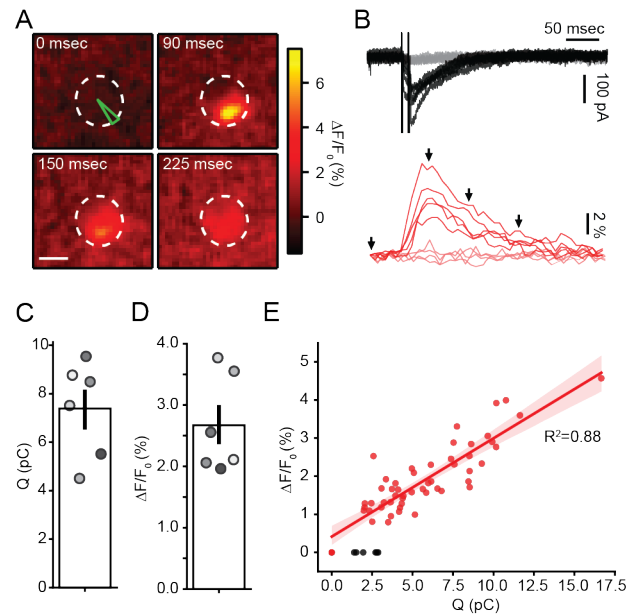

**Figure 2.** Efferent fiber electrical stimulation evokes localized  $\text{Ca}^{2+}$  signals in OHCs. A) Sequence of images showing the localized  $\text{Ca}^{2+}$  increase in an OHC following efferent fiber stimulation. Scale bar: 5  $\mu\text{m}$ . B) *Top*, Representative whole-cell current traces during double-pulse efferent electrical stimulation at 100 Hz ( $V_h = -100$  mV). Black traces represent those trials where an eIPSC was detected after the stimulus artifact (failures, in gray). *Bottom*, Representative  $\text{Ca}^{2+}$  transients taken at the ROI indicated in green on panel A, for the same trials shown on the top panel. Red traces correspond to trials where an IPSC was detected and failures in pink. C-D) Mean charge (C) and  $\Delta F/F_0$  (D) for successful efferent fiber stimulation trials. Bar plots are mean  $\pm$  SEM. E) Size of  $\text{Ca}^{2+}$  transients as function of charge during efferent stimulation trials in a representative OHC. Black dots represent successful IPSC events with no detectable fluorescence signal.

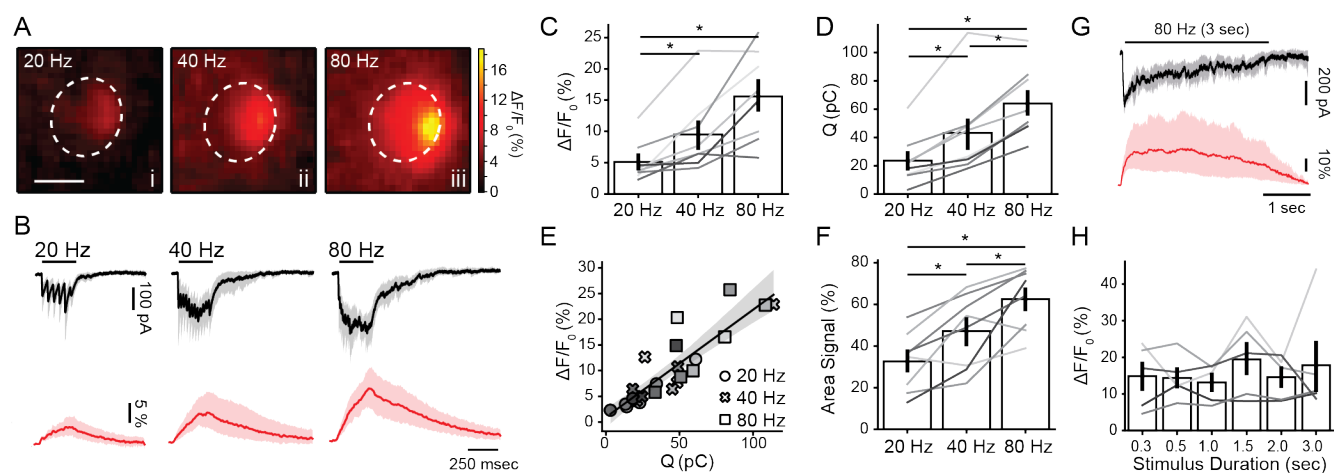

**Figure 3.** Amplitude and spread of efferent  $\text{Ca}^{2+}$  transients are dependent upon stimulation frequency. A) Representative images of an OHC at the peak of the fluorescence signal during efferent fiber electrical stimulation at 20 (i), 40 (ii) and 80 (iii) Hz. B) Mean inhibitory current traces (black) recorded during 300 msec efferent fiber electrical stimulation at 20, 40 and 80 Hz ( $V_h = -100$  mV). Red traces show the mean  $\Delta F/F_0$  at the ROI with the highest fluorescence signal. Peak  $\text{Ca}^{2+}$  values (C) and charge (D) for 300 msec stimulation trains at tested frequencies. E) Amplitude of fluorescence signal as a function of charge. Each symbol represent a different stimulation frequency. F) Spread of the  $\text{Ca}^{2+}$  signal within each OHC cytoplasmic space (as percentage of area in the imaged plane). Values were taken at the time point where signal peaked. G) Mean whole-cell synaptic response (black) and  $\text{Ca}^{2+}$  signals (red) obtained during 3 sec electrical stimulation of efferent fibers at 80 Hz. H) Peak fluorescence amplitude for trains with duration between 0.3 and 3 seconds (at 80 Hz). Bar plots are mean  $\pm$  SEM. Friedman's Test, \*  $p < 0.05$ .

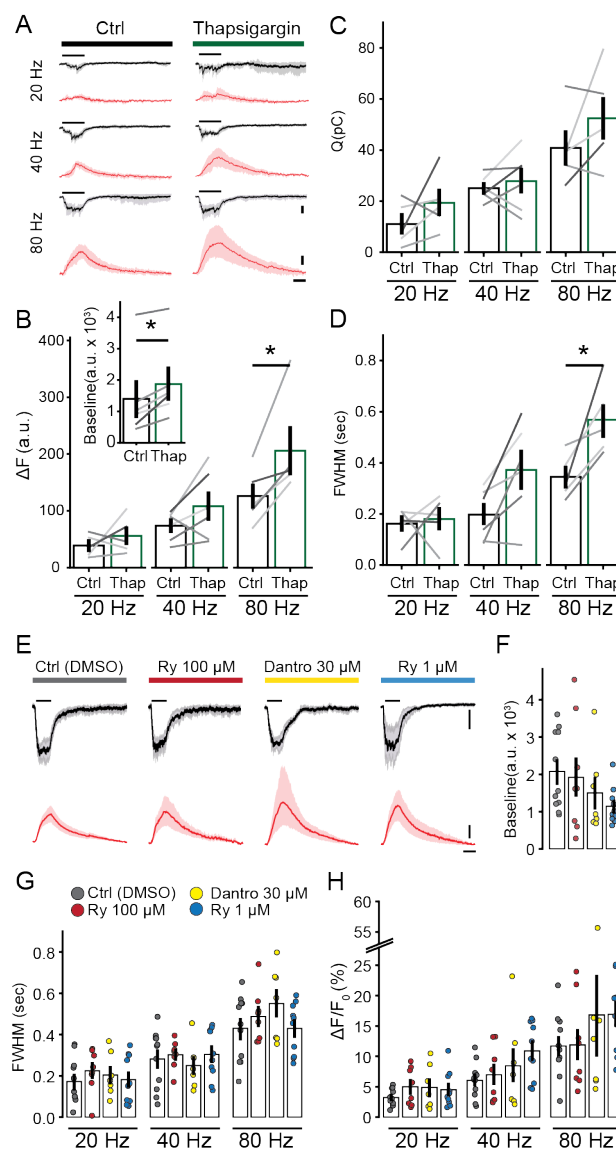

**Figure 4.** Efferent  $\text{Ca}^{2+}$  signals are modulated by cisternal ATPases, but not ryanodine receptors. A) Mean synaptic responses (black) and  $\text{Ca}^{2+}$  transients (red) during 300 msec electrical stimulation at 20,40 and 80 Hz before and after perfusion of Thapsigargin. B) Peak of  $\text{Ca}^{2+}$  transients (as  $\Delta F$ ), C) Charge of synaptic responses and D) duration of  $\text{Ca}^{2+}$  transients (as full width at half maximum, FWHM). Inset: Baseline fluorescence signal before and after perfusion of Thapsigargin. E) Synaptic currents (mean, black) and  $\text{Ca}^{2+}$  transients (red) obtained during efferent fibers stimulation (300 msec, 80 Hz), using an intracellular solution containing vehicle (DMSO), RyR blockers (Ryanodine 100  $\mu\text{M}$  and Dantrolene 30  $\mu\text{M}$ ) and a RyR agonist (Ryanodine 1  $\mu\text{M}$ ). F) Baseline fluorescence for each condi-

727 tion. G) Duration (FWHM) and H) maximal fluorescence signal (as  $\Delta F/F_0$ ) for each intracellular solu-  
 728 tion. Bar plots are mean  $\pm$  SEM. Wilcoxon signed-rank test, \*  $p < 0.05$ .  
 729

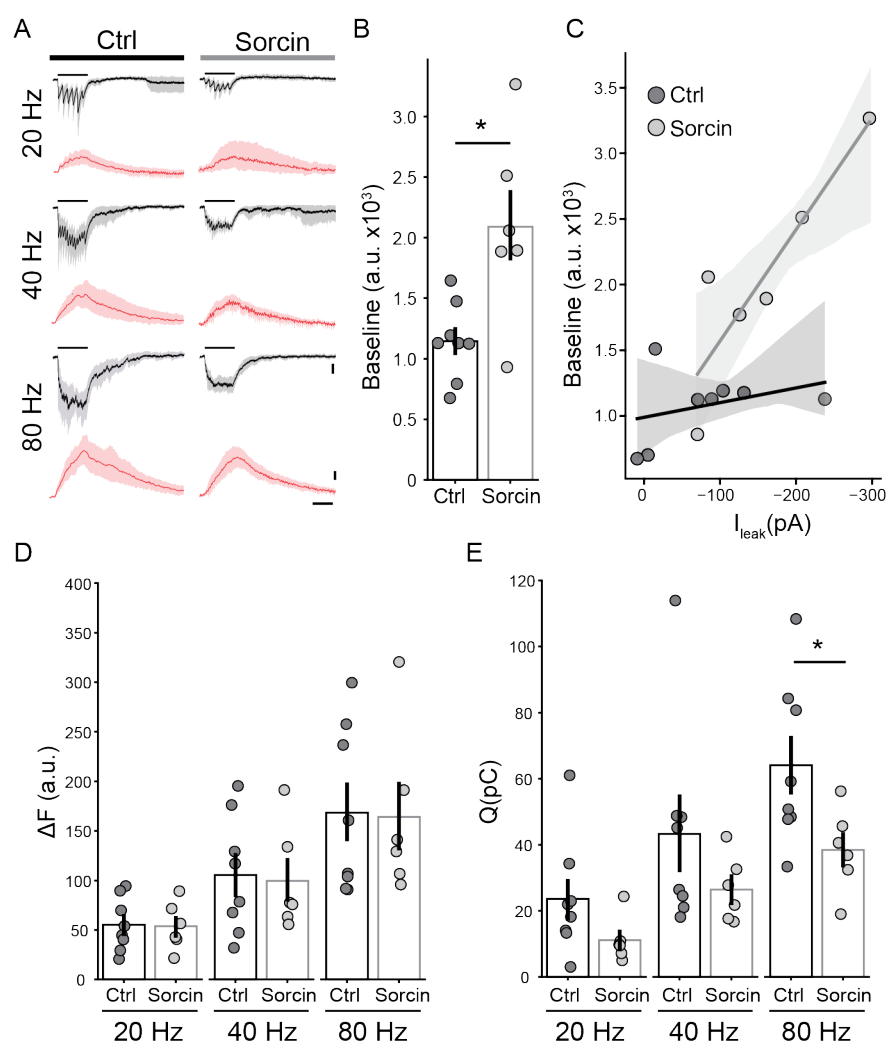

**Figure 5.** Sorcin produced a rise in resting  $\text{Ca}^{2+}$  levels and inhibited efferent synaptic currents. A) Mean traces of ensemble synaptic currents (black) and  $\text{Ca}^{2+}$  transients (red) in OHCs obtained by 300 msec electrical stimulation of efferent fibers at 20, 40 and 80 Hz in control conditions (Ctrl) and with the addition of sorcin to the intracellular solution. Scale bars: 50 pA, 25 A. U. and 200 msec. B) Baseline fluorescence in control conditions and in the presence of sorcin. C) Baseline fluorescence as a function of leak current ( $I_{\text{leak}}$ ) for each recorded cell during the first 10 minutes of recording. Linear fits were performed separately for control and sorcin groups. D) Peak of  $\text{Ca}^{2+}$  signals ( $\Delta F$ ) for different train frequencies and intracellular conditions. E) Integral of synaptic responses (Q) during trains of stimuli for each condition. Bar plots are mean  $\pm$  SEM. Mann-Whitney test, \*  $p < 0.05$ .

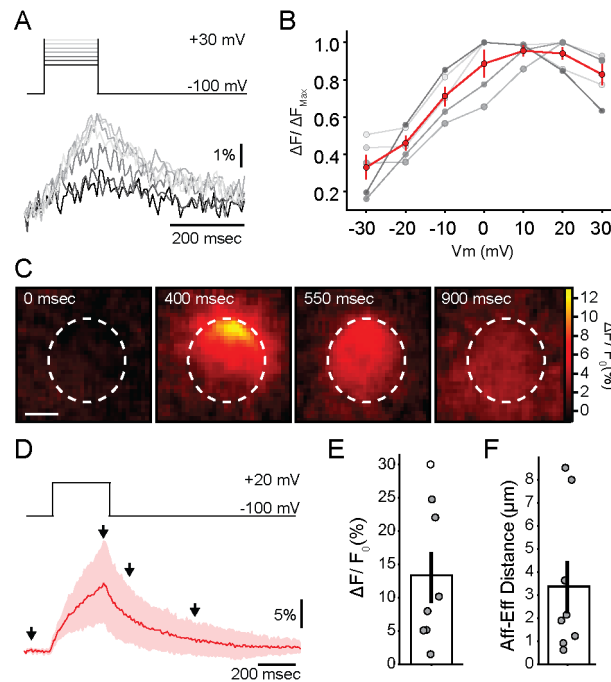

**Figure 6.**  $\text{Ca}^{2+}$  transients during VGCC activation in OHCs. A) Representative traces of  $\text{Ca}^{2+}$  transients measured at the brightest ROI, for voltage steps between -30 and +30 mV. B) Normalized maximum for  $\text{Ca}^{2+}$  transients in each cell (gray symbols) as a function of voltage. Red trace and marks represent mean  $\pm$  SEM. C) Sequence of images showing the localized  $\text{Ca}^{2+}$  concentration increase in an OHC during 300 msec depolarization to +20 mV. Scale bar: 5  $\mu\text{m}$ . D) Mean trace of the  $\text{Ca}^{2+}$  signal (in red) during a step pulse to +20 mV (top panel). E) Average  $\Delta F/F_0$  for +20 mV steps in OHCs. F) Average distance between locations of afferent (VGCC) and efferent (MOC)  $\text{Ca}^{2+}$  signals within each OHC. Bar plots are mean  $\pm$  SEM. Friedman's Test, \*  $p < 0.05$ .

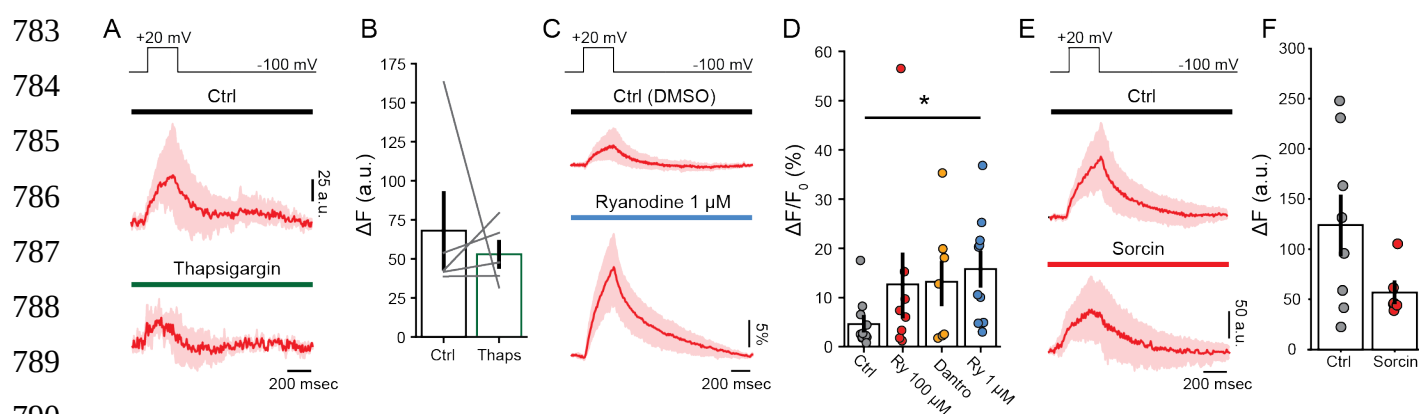

**Figure 7.** Modulation of afferent  $\text{Ca}^{2+}$  influx through VGCC by ryanodine and sorcin. A) Mean traces of the  $\text{Ca}^{2+}$  transients obtained with 300 msec depolarization to +20 mV before (top) and during perfusion of Thapsigargin (bottom). B) Average peak  $\text{Ca}^{2+}$  level ( $\Delta F$ ) for step depolarizations as in A). C) Mean traces of the  $\text{Ca}^{2+}$  transients during with steps to +20 mV, using intracellular solutions containing DMSO or Ryanodine 1  $\mu\text{M}$ . D) Average peak  $\text{Ca}^{2+}$  signal ( $\Delta F/F_0$ ) for experiments in C), and also with an antagonistic concentration of ryanodine (Ry) (100  $\mu\text{M}$ ) and dantrolene (30  $\mu\text{M}$ ). Wilcoxon signed-rank test, \*  $p < 0.05$ . E) Mean  $\Delta F$  traces obtained in OHCs loaded with sorcin protein or control. F) Mean peak fluorescence signal ( $\Delta F$ ) for experiments in E). Bars are mean  $\pm$  SEM.

|                       |                  | Q (pC)        | $\Delta F/F_0$ (%) | FWHM (sec)         |
|-----------------------|------------------|---------------|--------------------|--------------------|
| <b>Depolarization</b> | Ctrl (DMSO)      | -             | 5 ± 1 (n=11)       | 0.23 ± 0.04 (n=8)  |
|                       | Ryanodine 100 µM | -             | 13 ± 6 (n=8)       | 0.22 ± 0.07 (n=8)  |
|                       | Dantrolene 30 µM | -             | 13 ± 5 (n=7)       | 0.27 ± 0.07 (n=7)  |
|                       | Ryanodine 1 µM   | -             | 16 ± 3 (n=10)      | 0.35 ± 0.02 (n=10) |
|                       |                  |               |                    |                    |
| <b>20 Hz</b>          | Ctrl (DMSO)      | 20 ± 4 (n=11) | 3 ± 0 (n=11)       | 0.17 ± 0.03 (n=11) |
|                       | Ryanodine 100 µM | 21 ± 4 (n=8)  | 5 ± 1 (n=8)        | 0.22 ± 0.04 (n=8)  |
|                       | Dantrolene 30 µM | 13 ± 2 (n=7)  | 5 ± 1 (n=7)        | 0.20 ± 0.04 (n=7)  |
|                       | Ryanodine 1 µM   | 17 ± 5 (n=10) | 5 ± 1 (n=10)       | 0.18 ± 0.04 (n=10) |
|                       |                  |               |                    |                    |
| <b>40 Hz</b>          | Ctrl (DMSO)      | 34 ± 5 (n=11) | 6 ± 1 (n=11)       | 0.28 ± 0.04 (n=11) |
|                       | Ryanodine 100 µM | 32 ± 4 (n=8)  | 7 ± 2 (n=8)        | 0.30 ± 0.02 (n=8)  |
|                       | Dantrolene 30 µM | 27 ± 3 (n=7)  | 8 ± 3 (n=7)        | 0.25 ± 0.04 (n=7)  |
|                       | Ryanodine 1 µM   | 37 ± 6 (n=10) | 11 ± 2 (n=10)      | 0.30 ± 0.04 (n=10) |
|                       |                  |               |                    |                    |
| <b>80 Hz</b>          | Ctrl (DMSO)      | 61 ± 6 (n=11) | 12 ± 2 (n=11)      | 0.43 ± 0.05 (n=11) |
|                       | Ryanodine 100 µM | 48 ± 6 (n=8)  | 12 ± 3 (n=8)       | 0.49 ± 0.04 (n=8)  |
|                       | Dantrolene 30 µM | 46 ± 4 (n=7)  | 17 ± 7 (n=7)       | 0.55 ± 0.07 (n=7)  |
|                       | Ryanodine 1 µM   | 60 ± 7 (n=10) | 17 ± 2 (n=10)      | 0.43 ± 0.04 (n=10) |

Table I. Values for integral of synaptic currents, amplitude and duration  $Ca^{2+}$  signals during step depolarization of OHCs or MOC stimulation at 20, 40 and 80 Hz trains, in different pharmacological conditions.
